# Supplementary material for: From individual carbon inequality to equitable provincial mitigation effort-sharing in China
Source: Research Square preprint supplement (doi:10.21203/rs.3.rs-7509875/v1), 2025-09-12
Supplement: Supplementary file 1 [file 26aac949d0585227c3254198.xlsx]

## Sheet: Note
Supplementary Data 2: Original data for clustering analysis
Description:
This file provides the provincial-level data of the socio-economic indicators mentioned in Supplementary Information Section 1.3.

## Sheet: Data
Indicators	Beijing	Tianjin	Hebei	Shanxi	Inner Mongolia	Liaoning	Jilin	Heilongjiang	Shanghai	Jiangsu	Zhejiang	Anhui	Fujian	Jiangxi	Shandong	Henan	Hubei	Hunan	Guangdong	Guangxi	Hainan	Chongqing	Sichuan	Guizhou	Yunnan	Shaanxi	Gansu	Qinghai	Ningxia	Xinjiang
Per capita GDP ('000 RMB/person)	136.172	87.28	41.451	41.242	61.196	50.221	42.89	35.887	133.489	102.202	85.612	49.092	83.758	44.878	62.993	45.723	63.169	51.03	76.218	36.441	46.631	64.171	45.835	35.988	39.458	55.216	29.103	42.211	45.718	45.476
Ratio of tertiary sector value added to secondary sector value added	4.89399	1.69091	1.15298	1.07453	1.2553	1.37615	1.45944	1.65597	2.44473	1.09141	1.17103	1.13654	0.941516	0.945609	1.16075	0.942933	1.14499	1.2905	1.28451	1.4294	2.54757	1.22238	1.30917	1.32819	1.55589	0.950979	1.57453	1.28216	1.09794	1.34561
Ratio of per capita disposable income between urban and rural residents	2.5745	1.85152	2.37156	2.70041	2.83455	2.5455	2.1868	2.16707	2.24963	2.27696	2.05406	2.48001	2.38757	2.35599	2.43346	2.32392	2.30879	2.6243	2.59664	2.69333	2.38854	2.54732	2.51304	3.27884	3.14297	3.00146	3.43772	3.08275	2.74465	2.78633
Urbanization rate	0.869189	0.835461	0.55743	0.58604	0.646116	0.694805	0.596991	0.619006	0.890916	0.701769	0.689141	0.542843	0.657811	0.557083	rial	0.505647	0.598747	0.546208	0.707438	0.505808	0.580247	0.650127	0.517795	0.477518	0.462817	0.580686	0.481364	0.554608	0.609929	0.518952
Per capita capital stock (10,000 RMB/person)	26.5296	46.1376	15.2597	15.3168	34.12	21.084	26.2716	17.4793	26.6217	24.0928	20.1353	11.5734	21.4659	11.3467	20.9962	17.0564	17.4595	14.5458	15.8725	13.851	15.3508	16.145	11.4828	10.4141	14.6725	19.3145	10.021	30.1024	26.4638	19.9927
Average years of schooling	12.64	11.29	9.84	10.45	10.08	10.34	10.17	9.93	11.81	10.21	9.79	9.35	9.66	9.7	9.75	9.79	10.02	9.88	10.38	9.54	10.1	9.8	9.24	8.75	8.82	10.26	9.13	8.85	9.81	10.11
Share of population with higher education	0.4198	0.2694	0.12418	0.17358	0.18688	0.18216	0.16738	0.14793	0.33872	0.18663	0.1699	0.1328	0.14148	0.11897	0.14384	0.11744	0.15502	0.12239	0.15699	0.10806	0.13919	0.15412	0.13267	0.10952	0.11601	0.18397	0.14506	0.1488	0.1734	0.16536
Share of public expenditures on social protection, healthcare, and education in total government expenditure	0.320589	0.327877	0.430555	0.422913	0.350882	0.476538	0.359155	0.387589	0.311	0.358957	0.373968	0.398977	0.353791	0.410271	0.415971	0.424806	0.412915	0.395844	0.352879	0.430099	0.367958	0.3881	0.428075	0.398244	0.401831	0.40651	0.4009	0.341268	0.313925	0.326768
The proportion of self-employed individuals and private-sector workers relative to employees in state-owned or institutional work units	1.40411	0.880891	2.09247	1.38092	2.09765	1.76054	2.36698	0.975787	2.12605	2.28621	2.55647	2.38803	1.93086	2.0082	2.27949	1.25857	2.43626	1.414	2.12908	1.97839	1.89891	2.87549	1.21914	2.12373	1.88518	1.11109	2.04784	1.5545	2.42053	1.86866
Density of public roads per capita (km/10,000 persons)	10.1185	11.7021	25.8739	40.7123	81.9564	28.4555	41.1322	48.8379	5.39335	18.8175	19.4652	33.5645	26.5683	35.9787	26.971	27.2459	45.647	36.1375	18.0875	25.1274	31.5844	47.042	39.8118	51.1175	51.6727	44.6721	56.4235	138.055	49.078	74.7177
