# Supplementary material for: From individual carbon inequality to equitable provincial mitigation effort-sharing in China
Source: Research Square preprint supplement (doi:10.21203/rs.3.rs-7509875/v1), 2025-09-12
Supplement: Supplementary file 2 [file 2d56ade77c08e38b22cea0b4.xlsx]

## Sheet: Note
Supplementary Data 1: Individual-level data by income group for each province
Description:
This file contains 30 sheets, each corresponding to a province. For each province, data are provided for 100 percentile groups, including per capita income, household consumption carbon footprint, capital formation carbon footprint, and government consumption carbon footprint.
Sheet name	Region		Abbreviation	Full name
Sheet1	Beijing		CF	Total carbon footprint
Sheet2	Tianjin		HCCF	Household consumption carbon footprint
Sheet3	Hebei		Inv_CF	Capital formation carbon footprint
Sheet4	Shanxi		Gov_CF	Government consumption carbon footprint
Sheet5	Inner Mongolia
Sheet6	Liaoning
Sheet7	Jilin
Sheet8	Heilongjiang
Sheet9	Shanghai
Sheet10	Jiangsu
Sheet11	Zhejiang
Sheet12	Anhui
Sheet13	Fujian
Sheet14	Jiangxi
Sheet15	Shandong
Sheet16	Henan
Sheet17	Hubei
Sheet18	Hunan
Sheet19	Guangdong
Sheet20	Guangxi
Sheet21	Hainan
Sheet22	Chongqing
Sheet23	Sichuan
Sheet24	Guizhou
Sheet25	Yunnan
Sheet26	Shaanxi
Sheet27	Gansu
Sheet28	Qinghai
Sheet29	Ningxia
Sheet30	Xinjiang
Sheet31	China

## Sheet: Sheet1
Percentiles	Income (RMB)	HCCF (t CO2)	Inv_CF (t CO2)	Gov_CF (t CO2)	CF (t CO2)
p0~p1	4531.17	0.793714	0.463782	1.314	2.5715
p1~p2	6596.95	1.04436	0.426977	1.314	2.78534
p2~p3	7860.34	1.18456	0.580568	1.314	3.07913
p3~p4	8884.87	1.2935	0.734176	1.314	3.34168
p4~p5	9782.05	1.38598	0.813472	1.314	3.51345
p5~p6	10598.6	1.46808	0.811824	1.314	3.5939
p6~p7	11359.5	1.54296	0.891064	1.314	3.74803
p7~p8	12079.5	1.61254	0.877963	1.314	3.8045
p8~p9	12768.6	1.67803	1.03608	1.314	4.02811
p9~p10	13433.7	1.7403	0.932057	1.314	3.98635
p10~p11	14079.7	1.79995	1.11936	1.314	4.23331
p11~p12	14710.6	1.85746	1.13247	1.314	4.30393
p12~p13	15329.3	1.91319	1.07566	1.314	4.30285
p13~p14	15938.2	1.96741	1.08519	1.314	4.36661
p14~p15	16539.2	2.02037	1.40033	1.314	4.7347
p15~p16	17134.1	2.07225	1.1715	1.314	4.55775
p16~p17	17724.2	2.12322	1.51422	1.314	4.95144
p17~p18	18310.7	2.1734	1.4855	1.314	4.97289
p18~p19	18894.7	2.22291	1.40045	1.314	4.93736
p19~p20	19477.1	2.27186	1.11797	1.314	4.70383
p20~p21	20058.7	2.32034	1.46326	1.314	5.09759
p21~p22	20640.3	2.36841	1.76011	1.314	5.44252
p22~p23	21222.6	2.41616	1.74622	1.314	5.47639
p23~p24	21806.2	2.46365	1.64947	1.314	5.42712
p24~p25	22391.7	2.51094	1.72221	1.314	5.54715
p25~p26	22979.7	2.55808	1.96464	1.314	5.83672
p26~p27	23570.7	2.60511	1.91203	1.314	5.83114
p27~p28	24165.3	2.6521	2.14596	1.314	6.11206
p28~p29	24763.9	2.69907	1.84517	1.314	5.85824
p29~p30	25367	2.74607	1.78607	1.314	5.84615
p30~p31	25975.1	2.79315	1.86271	1.314	5.96986
p31~p32	26588.7	2.84033	1.98118	1.314	6.13552
p32~p33	27208.2	2.88766	2.10838	1.314	6.31004
p33~p34	27834.1	2.93517	2.11847	1.314	6.36764
p34~p35	28466.9	2.9829	2.56634	1.314	6.86324
p35~p36	29107	3.03087	1.91102	1.314	6.25589
p36~p37	29754.9	3.07913	1.97018	1.314	6.36331
p37~p38	30411.1	3.1277	2.04378	1.314	6.48548
p38~p39	31076.1	3.17663	2.49402	1.314	6.98465
p39~p40	31750.5	3.22594	2.19262	1.314	6.73256
p40~p41	32434.6	3.27566	2.59601	1.314	7.18567
p41~p42	33129.2	3.32584	2.22094	1.314	6.86078
p42~p43	33834.6	3.3765	2.33024	1.314	7.02074
p43~p44	34551.6	3.42769	1.97426	1.314	6.71595
p44~p45	35280.7	3.47943	2.38227	1.314	7.1757
p45~p46	36022.6	3.53177	2.23365	1.314	7.07943
p46~p47	36777.9	3.58475	2.42787	1.314	7.32662
p47~p48	37547.3	3.6384	2.65064	1.314	7.60304
p48~p49	38331.6	3.69277	2.55798	1.314	7.56475
p49~p50	39131.4	3.74789	2.83206	1.314	7.89395
p50~p51	39947.7	3.80383	2.93179	1.314	8.04961
p51~p52	40781.3	3.86061	3.05481	1.314	8.22943
p52~p53	41633.1	3.9183	3.00686	1.314	8.23916
p53~p54	42504.1	3.97694	2.9493	1.314	8.24024
p54~p55	43395.3	4.0366	2.78048	1.314	8.13108
p55~p56	44307.8	4.09732	3.01141	1.314	8.42273
p56~p57	45242.8	4.15917	3.27045	1.314	8.74362
p57~p58	46201.6	4.22222	3.0923	1.314	8.62852
p58~p59	47185.4	4.28654	3.64085	1.314	9.24139
p59~p60	48195.9	4.35221	3.3374	1.314	9.00361
p60~p61	49234.4	4.41929	2.82802	1.314	8.56131
p61~p62	50302.8	4.48789	2.89666	1.314	8.69855
p62~p63	51402.8	4.55809	3.57022	1.314	9.44231
p63~p64	52536.5	4.63	3.69234	1.314	9.63634
p64~p65	53706.1	4.70372	3.36986	1.314	9.38758
p65~p66	54913.7	4.77937	3.23518	1.314	9.32855
p66~p67	56162.2	4.85709	3.08442	1.314	9.25551
p67~p68	57454.2	4.937	3.35994	1.314	9.61094
p68~p69	58793	5.01927	3.33737	1.314	9.67064
p69~p70	60181.9	5.10406	3.68116	1.314	10.0992
p70~p71	61624.7	5.19157	4.09681	1.314	10.6024
p71~p72	63125.6	5.28198	3.82573	1.314	10.4217
p72~p73	64689.4	5.37554	3.74071	1.314	10.4302
p73~p74	66321.3	5.47249	3.77352	1.314	10.56
p74~p75	68027.1	5.57312	3.93414	1.314	10.8213
p75~p76	69813.7	5.67775	4.05591	1.314	11.0477
p76~p77	71688.4	5.78674	4.13787	1.314	11.2386
p77~p78	73660	5.90048	4.44783	1.314	11.6623
p78~p79	75738.2	6.01946	4.89416	1.314	12.2276
p79~p80	77934.6	6.14419	4.28242	1.314	11.7406
p80~p81	80262.1	6.2753	4.11886	1.314	11.7082
p81~p82	82736.4	6.41351	4.50248	1.314	12.23
p82~p83	85375.6	6.55964	4.37504	1.314	12.2487
p83~p84	88201.4	6.71469	5.14843	1.314	13.1771
p84~p85	91239.8	6.87986	5.45509	1.314	13.6489
p85~p86	94522.4	7.05656	5.50133	1.314	13.8719
p86~p87	98088.1	7.24655	5.65995	1.314	14.2205
p87~p88	101986	7.45199	5.6957	1.314	14.4617
p88~p89	106277	7.67563	5.65754	1.314	14.6472
p89~p90	111041	7.92096	6.22391	1.314	15.4589
p90~p91	116384	8.1926	5.78673	1.314	15.2933
p91~p92	122450	8.49675	6.29309	1.314	16.1038
p92~p93	129442	8.84206	6.09748	1.314	16.2535
p93~p94	137657	9.24109	6.39706	1.314	16.9521
p94~p95	147554	9.71301	6.82026	1.314	17.8473
p95~p96	159900	10.2893	7.55048	1.314	19.1537
p96~p97	176102	11.0267	7.97622	1.314	20.3169
p97~p98	199200	12.0453	8.51906	1.314	21.8784
p98~p99	237928	13.6795	9.87456	1.314	24.868
p99~p100	368603	18.5799	12.3065	1.314	32.2004

## Sheet: Sheet2
Percentiles	Income (RMB)	HCCF (t CO2)	Inv_CF (t CO2)	Gov_CF (t CO2)	CF (t CO2)
p0~p1	1060.66	0.3098	0.569315	0.618	1.49712
p1~p2	1727.98	0.429163	0.621344	0.618	1.66851
p2~p3	2178.47	0.499032	0.844785	0.618	1.96182
p3~p4	2562.08	0.554508	0.802137	0.618	1.97465
p4~p5	2910.2	0.602345	0.915866	0.618	2.13621
p5~p6	3236.3	0.64535	0.986396	0.618	2.24975
p6~p7	3547.6	0.685	0.927293	0.618	2.23029
p7~p8	3848.55	0.722182	1.37256	0.618	2.71274
p8~p9	4142.09	0.757476	1.11229	0.618	2.48776
p9~p10	4430.33	0.791286	1.01026	0.618	2.41954
p10~p11	4714.82	0.823906	1.23124	0.618	2.67314
p11~p12	4996.75	0.855557	1.17578	0.618	2.64934
p12~p13	5277.08	0.886412	1.45974	0.618	2.96415
p13~p14	5556.6	0.916609	1.42604	0.618	2.96064
p14~p15	5835.95	0.94626	1.22235	0.618	2.78661
p15~p16	6115.7	0.975458	1.59977	0.618	3.19323
p16~p17	6396.34	1.00428	1.47772	0.618	3.1
p17~p18	6678.3	1.0328	1.58947	0.618	3.24026
p18~p19	6961.98	1.06106	1.67816	0.618	3.35722
p19~p20	7247.74	1.08913	1.62492	0.618	3.33205
p20~p21	7535.9	1.11704	1.72455	0.618	3.45959
p21~p22	7826.79	1.14484	1.45107	0.618	3.21391
p22~p23	8120.7	1.17256	1.89165	0.618	3.6822
p23~p24	8417.91	1.20023	1.52365	0.618	3.34188
p24~p25	8718.72	1.2279	1.86311	0.618	3.70901
p25~p26	9023.38	1.25558	2.22594	0.618	4.09952
p26~p27	9332.18	1.2833	1.86706	0.618	3.76836
p27~p28	9645.38	1.31109	1.73811	0.618	3.6672
p28~p29	9963.24	1.33897	2.24898	0.618	4.20595
p29~p30	10286	1.36697	1.8693	0.618	3.85427
p30~p31	10614.1	1.3951	1.76005	0.618	3.77316
p31~p32	10947.6	1.4234	1.91657	0.618	3.95797
p32~p33	11286.8	1.45187	1.95032	0.618	4.02019
p33~p34	11632.2	1.48055	2.5067	0.618	4.60525
p34~p35	11983.9	1.50945	1.98588	0.618	4.11333
p35~p36	12342.2	1.5386	2.53746	0.618	4.69406
p36~p37	12707.6	1.56801	2.85163	0.618	5.03764
p37~p38	13080.3	1.5977	2.52317	0.618	4.73887
p38~p39	13460.7	1.6277	2.3357	0.618	4.5814
p39~p40	13849.1	1.65803	2.63008	0.618	4.90611
p40~p41	14245.9	1.68871	2.21904	0.618	4.52575
p41~p42	14651.5	1.71976	2.14198	0.618	4.47974
p42~p43	15066.4	1.75121	2.62443	0.618	4.99364
p43~p44	15490.9	1.78308	2.51369	0.618	4.91477
p44~p45	15925.5	1.81539	2.33865	0.618	4.77204
p45~p46	16370.8	1.84817	3.34257	0.618	5.80874
p46~p47	16827.2	1.88144	2.73406	0.618	5.2335
p47~p48	17295.2	1.91525	2.73398	0.618	5.26722
p48~p49	17775.5	1.9496	2.97432	0.618	5.54192
p49~p50	18268.7	1.98453	3.06056	0.618	5.66309
p50~p51	18775.4	2.02008	2.34865	0.618	4.98673
p51~p52	19296.3	2.05628	2.81926	0.618	5.49354
p52~p53	19832.2	2.09317	3.17343	0.618	5.8846
p53~p54	20383.8	2.13077	3.22223	0.618	5.971
p54~p55	20952.1	2.16914	2.99051	0.618	5.77765
p55~p56	21537.9	2.20831	3.07924	0.618	5.90555
p56~p57	22142.2	2.24832	3.09646	0.618	5.96278
p57~p58	22766.1	2.28924	2.79583	0.618	5.70307
p58~p59	23410.7	2.3311	3.56871	0.618	6.51781
p59~p60	24077.3	2.37396	3.25524	0.618	6.2472
p60~p61	24767.2	2.41789	3.18041	0.618	6.2163
p61~p62	25481.9	2.46295	3.98201	0.618	7.06295
p62~p63	26222.9	2.50919	2.93403	0.618	6.06122
p63~p64	26992	2.55671	2.86295	0.618	6.03766
p64~p65	27791.1	2.60558	3.53005	0.618	6.75364
p65~p66	28622.3	2.65589	3.22634	0.618	6.50023
p66~p67	29487.7	2.70774	3.69458	0.618	7.02032
p67~p68	30390	2.76123	3.88402	0.618	7.26324
p68~p69	31331.8	2.81647	3.43392	0.618	6.86839
p69~p70	32316.4	2.87359	3.92713	0.618	7.41872
p70~p71	33347	2.93274	3.98778	0.618	7.53852
p71~p72	34427.5	2.99406	4.10319	0.618	7.71525
p72~p73	35562.2	3.05774	4.19454	0.618	7.87028
p73~p74	36755.8	3.12396	4.4333	0.618	8.17526
p74~p75	38013.8	3.19294	4.02066	0.618	7.8316
p75~p76	39342.3	3.26492	4.14926	0.618	8.03218
p76~p77	40748.4	3.34018	4.61222	0.618	8.5704
p77~p78	42240	3.41903	4.57474	0.618	8.61177
p78~p79	43826.4	3.50183	5.12589	0.618	9.24572
p79~p80	45518.4	3.58898	4.46698	0.618	8.67396
p80~p81	47328.5	3.68097	4.45488	0.618	8.75385
p81~p82	49271.6	3.77835	5.01428	0.618	9.41063
p82~p83	51365	3.88177	4.74033	0.618	9.24009
p83~p84	53629.9	3.992	4.86901	0.618	9.47901
p84~p85	56091.7	4.10998	4.96713	0.618	9.69512
p85~p86	58781.5	4.23683	5.93241	0.618	10.7872
p86~p87	61737.9	4.37392	5.98566	0.618	10.9776
p87~p88	65009.5	4.52297	7.08007	0.618	12.221
p88~p89	68658.8	4.68615	5.63722	0.618	10.9414
p89~p90	72767	4.86625	6.12836	0.618	11.6126
p90~p91	77443.3	5.06695	7.13081	0.618	12.8158
p91~p92	82837.5	5.29326	7.14963	0.618	13.0609
p92~p93	89163.6	5.55215	7.78249	0.618	13.9526
p93~p94	96739.3	5.85382	8.31424	0.618	14.7861
p94~p95	106064	6.21396	7.68676	0.618	14.5187
p95~p96	117985	6.65847	8.71954	0.618	15.996
p96~p97	134092	7.23461	9.82622	0.618	17.6788
p97~p98	157906	8.04317	13.1042	0.618	21.7653
p98~p99	199925	9.3695	11.8123	0.618	21.7998
p99~p100	363693	13.5873	20.7593	0.618	34.9646

## Sheet: Sheet3
Percentiles	Income (RMB)	HCCF (t CO2)	Inv_CF (t CO2)	Gov_CF (t CO2)	CF (t CO2)
p0~p1	133.663	0.0787259	1.47387	0.515	2.0676
p1~p2	347.354	0.172596	1.27924	0.515	1.96683
p2~p3	538.375	0.245017	1.72916	0.515	2.48918
p3~p4	719.77	0.308877	1.4847	0.515	2.30858
p4~p5	895.474	0.367613	1.6389	0.515	2.52152
p5~p6	1067.44	0.422842	1.62498	0.515	2.56282
p6~p7	1236.85	0.475488	1.85002	0.515	2.84051
p7~p8	1404.47	0.526145	1.27942	0.515	2.32056
p8~p9	1570.87	0.575221	1.69031	0.515	2.78054
p9~p10	1736.44	0.623013	1.30211	0.515	2.44012
p10~p11	1901.54	0.669748	2.04879	0.515	3.23354
p11~p12	2066.41	0.7156	1.55135	0.515	2.78195
p12~p13	2231.28	0.760712	2.189	0.515	3.46471
p13~p14	2396.34	0.805198	1.98172	0.515	3.30192
p14~p15	2561.75	0.849156	1.93219	0.515	3.29635
p15~p16	2727.65	0.892668	1.70761	0.515	3.11527
p16~p17	2894.18	0.935803	1.9978	0.515	3.4486
p17~p18	3061.44	0.978624	1.77702	0.515	3.27065
p18~p19	3229.56	1.02118	1.74386	0.515	3.28004
p19~p20	3398.62	1.06353	2.02051	0.515	3.59904
p20~p21	3568.73	1.10571	2.12055	0.515	3.74126
p21~p22	3739.99	1.14776	2.33512	0.515	3.99788
p22~p23	3912.47	1.18972	2.27159	0.515	3.97631
p23~p24	4086.26	1.23162	2.31114	0.515	4.05775
p24~p25	4261.46	1.27349	2.75511	0.515	4.5436
p25~p26	4438.13	1.31535	1.90863	0.515	3.73899
p26~p27	4616.37	1.35725	2.2072	0.515	4.07945
p27~p28	4796.26	1.3992	1.96522	0.515	3.87942
p28~p29	4977.87	1.44123	2.35033	0.515	4.30656
p29~p30	5161.29	1.48336	2.6278	0.515	4.62616
p30~p31	5346.6	1.52562	2.31432	0.515	4.35494
p31~p32	5533.89	1.56803	2.47746	0.515	4.56049
p32~p33	5723.25	1.61061	2.54242	0.515	4.66803
p33~p34	5914.76	1.65338	2.38835	0.515	4.55673
p34~p35	6108.51	1.69636	2.39287	0.515	4.60423
p35~p36	6304.59	1.73959	1.98739	0.515	4.24198
p36~p37	6503.11	1.78307	2.63303	0.515	4.9311
p37~p38	6704.16	1.82682	3.19007	0.515	5.5319
p38~p39	6907.83	1.87088	2.65096	0.515	5.03684
p39~p40	7114.24	1.91527	2.26976	0.515	4.70003
p40~p41	7323.5	1.95999	2.94987	0.515	5.42486
p41~p42	7535.72	2.00509	2.29679	0.515	4.81688
p42~p43	7751.02	2.05058	2.84606	0.515	5.41164
p43~p44	7969.52	2.09648	2.43895	0.515	5.05043
p44~p45	8191.36	2.14282	2.63474	0.515	5.29255
p45~p46	8416.66	2.18962	2.64336	0.515	5.34798
p46~p47	8645.58	2.23691	3.03916	0.515	5.79107
p47~p48	8878.27	2.28472	2.47694	0.515	5.27666
p48~p49	9114.87	2.33308	3.45356	0.515	6.30164
p49~p50	9355.57	2.38201	2.97598	0.515	5.87298
p50~p51	9600.53	2.43154	2.71901	0.515	5.66556
p51~p52	9849.95	2.48171	3.33189	0.515	6.3286
p52~p53	10104	2.53255	3.22493	0.515	6.27248
p53~p54	10362.9	2.5841	2.96049	0.515	6.05958
p54~p55	10626.9	2.63638	3.6669	0.515	6.81828
p55~p56	10896.3	2.68945	3.32722	0.515	6.53167
p56~p57	11171.2	2.74334	4.08178	0.515	7.34012
p57~p58	11451.9	2.7981	4.13208	0.515	7.44518
p58~p59	11738.7	2.85378	3.65803	0.515	7.0268
p59~p60	12032	2.91041	3.35738	0.515	6.78279
p60~p61	12332.1	2.96806	3.34013	0.515	6.8232
p61~p62	12639.3	3.02679	3.76049	0.515	7.30228
p62~p63	12954	3.08665	3.98925	0.515	7.5909
p63~p64	13276.6	3.14771	3.50643	0.515	7.16914
p64~p65	13607.6	3.21004	3.63292	0.515	7.35796
p65~p66	13947.5	3.27372	3.68134	0.515	7.47007
p66~p67	14296.7	3.33884	4.08136	0.515	7.9352
p67~p68	14655.9	3.40547	3.64605	0.515	7.56652
p68~p69	15025.7	3.47372	4.28947	0.515	8.27818
p69~p70	15406.8	3.54369	3.62624	0.515	7.68493
p70~p71	15800	3.61551	3.71441	0.515	7.84493
p71~p72	16206	3.6893	4.85008	0.515	9.05438
p72~p73	16625.8	3.76521	4.10475	0.515	8.38496
p73~p74	17060.5	3.84339	4.53208	0.515	8.89047
p74~p75	17511.1	3.92402	3.98407	0.515	8.42309
p75~p76	17979.1	4.00729	4.28089	0.515	8.80318
p76~p77	18465.7	4.09343	4.71009	0.515	9.31851
p77~p78	18972.7	4.18267	4.33898	0.515	9.03665
p78~p79	19501.9	4.27531	5.58008	0.515	10.3704
p79~p80	20055.4	4.37166	5.57727	0.515	10.4639
p80~p81	20635.7	4.47208	4.90425	0.515	9.89133
p81~p82	21245.5	4.57701	4.92361	0.515	10.0156
p82~p83	21888.2	4.68693	5.71218	0.515	10.9141
p83~p84	22567.6	4.80241	5.99908	0.515	11.3165
p84~p85	23288.4	4.92415	5.78637	0.515	11.2255
p85~p86	24056	5.05296	6.03135	0.515	11.5993
p86~p87	24877.1	5.18983	6.02158	0.515	11.7264
p87~p88	25759.9	5.33597	7.58383	0.515	13.4348
p88~p89	26714.9	5.49289	7.02086	0.515	13.0288
p89~p90	27755	5.66252	7.70668	0.515	13.8842
p90~p91	28897.4	5.84733	6.51228	0.515	12.8746
p91~p92	30164.7	6.05064	8.0726	0.515	14.6382
p92~p93	31588.5	6.27697	8.18224	0.515	14.9742
p93~p94	33213.7	6.53278	8.4933	0.515	15.5411
p94~p95	35107.9	6.82774	8.79965	0.515	16.1424
p95~p96	37380.3	7.17735	8.9626	0.515	16.6549
p96~p97	40224.5	7.60884	11.6429	0.515	19.7667
p97~p98	44038	8.17769	13.6687	0.515	22.3614
p98~p99	49888.6	9.03091	16.5908	0.515	26.1367
p99~p100	65280.7	11.1657	27.4418	0.515	39.1225

## Sheet: Sheet4
Percentiles	Income (RMB)	HCCF (t CO2)	Inv_CF (t CO2)	Gov_CF (t CO2)	CF (t CO2)
p0~p1	193.401	0.131439	1.56773	0.53	2.22917
p1~p2	450.955	0.259874	1.82433	0.53	2.61421
p2~p3	705.642	0.373471	1.92856	0.53	2.83203
p3~p4	908.781	0.457905	2.02282	0.53	3.01073
p4~p5	1093.47	0.531439	1.70527	0.53	2.76671
p5~p6	1265.61	0.597783	2.28865	0.53	3.41643
p6~p7	1430.39	0.659644	1.32497	0.53	2.51461
p7~p8	1589.98	0.718233	1.58304	0.53	2.83127
p8~p9	1746.06	0.774428	2.13029	0.53	3.43472
p9~p10	1899.84	0.828836	1.55276	0.53	2.9116
p10~p11	2051.85	0.881776	1.74377	0.53	3.15555
p11~p12	2202.21	0.933389	1.5708	0.53	3.03419
p12~p13	2352.08	0.984152	1.99116	0.53	3.50531
p13~p14	2501.69	1.0342	1.9945	0.53	3.5587
p14~p15	2651.48	1.08372	1.95193	0.53	3.56565
p15~p16	2800.91	1.13258	2.12313	0.53	3.78571
p16~p17	2950.65	1.18103	2.3485	0.53	4.05953
p17~p18	3100.72	1.22911	2.16747	0.53	3.92658
p18~p19	3251.35	1.27691	1.77944	0.53	3.58635
p19~p20	3402.73	1.32452	2.36901	0.53	4.22353
p20~p21	3554.94	1.37197	1.95407	0.53	3.85604
p21~p22	3708.14	1.41933	2.22288	0.53	4.17221
p22~p23	3862.3	1.4666	2.22518	0.53	4.22178
p23~p24	4017.6	1.51385	2.51325	0.53	4.55709
p24~p25	4173.97	1.56106	1.93951	0.53	4.03056
p25~p26	4331.76	1.60835	2.36394	0.53	4.50229
p26~p27	4490.81	1.65568	2.07464	0.53	4.26032
p27~p28	4651.36	1.70312	2.10421	0.53	4.33733
p28~p29	4813.29	1.75065	2.64483	0.53	4.92548
p29~p30	4976.87	1.79835	2.38325	0.53	4.7116
p30~p31	5142.21	1.84625	2.29858	0.53	4.67482
p31~p32	5309.13	1.8943	2.13541	0.53	4.55971
p32~p33	5477.82	1.94256	1.98887	0.53	4.46143
p33~p34	5648.31	1.99104	2.30789	0.53	4.82893
p34~p35	5820.78	2.0398	2.59914	0.53	5.16894
p35~p36	5995.23	2.08882	2.3523	0.53	4.97112
p36~p37	6171.74	2.13815	2.1343	0.53	4.80245
p37~p38	6350.36	2.18778	2.04757	0.53	4.76535
p38~p39	6531.23	2.23776	2.41664	0.53	5.1844
p39~p40	6714.38	2.28809	2.62726	0.53	5.44536
p40~p41	6899.72	2.33876	2.9217	0.53	5.79046
p41~p42	7087.84	2.38991	2.71524	0.53	5.63515
p42~p43	7278.53	2.44149	3.11222	0.53	6.08371
p43~p44	7471.78	2.49349	2.81145	0.53	5.83494
p44~p45	7667.78	2.54597	2.44017	0.53	5.51614
p45~p46	7866.64	2.59894	2.71052	0.53	5.83946
p46~p47	8068.5	2.65245	2.66806	0.53	5.85051
p47~p48	8273.45	2.7065	3.528	0.53	6.76451
p48~p49	8481.65	2.76115	3.43159	0.53	6.72274
p49~p50	8693.1	2.81638	2.64788	0.53	5.99426
p50~p51	8908.16	2.87229	3.37093	0.53	6.77321
p51~p52	9126.95	2.92889	2.42233	0.53	5.88122
p52~p53	9349.48	2.98619	2.62581	0.53	6.142
p53~p54	9576	3.04424	3.3036	0.53	6.87785
p54~p55	9806.67	3.10309	3.0422	0.53	6.67529
p55~p56	10041.7	3.16277	3.52693	0.53	7.21969
p56~p57	10281.3	3.22332	2.98125	0.53	6.73457
p57~p58	10525.7	3.28481	2.88816	0.53	6.70297
p58~p59	10775.2	3.34728	3.77232	0.53	7.6496
p59~p60	11029.9	3.41079	4.17741	0.53	8.1182
p60~p61	11290.2	3.47538	3.05757	0.53	7.06295
p61~p62	11556.4	3.54114	3.47038	0.53	7.54152
p62~p63	11828.8	3.60812	2.91126	0.53	7.04938
p63~p64	12107.8	3.6764	2.85361	0.53	7.06001
p64~p65	12393.7	3.74606	3.70268	0.53	7.97874
p65~p66	12686.9	3.81718	3.25479	0.53	7.60197
p66~p67	12988	3.88987	3.89018	0.53	8.31004
p67~p68	13297.4	3.96422	3.37414	0.53	7.86836
p68~p69	13615.6	4.04034	4.02652	0.53	8.59686
p69~p70	13943.2	4.11836	4.0092	0.53	8.65756
p70~p71	14281	4.19842	3.88032	0.53	8.60874
p71~p72	14629.6	4.28066	3.95043	0.53	8.76109
p72~p73	14989.9	4.36524	3.67854	0.53	8.57378
p73~p74	15362.9	4.4524	4.58489	0.53	9.5673
p74~p75	15749.2	4.54222	4.36105	0.53	9.43326
p75~p76	16150.3	4.63503	4.30392	0.53	9.46894
p76~p77	16567.7	4.73114	4.32157	0.53	9.5827
p77~p78	17002.4	4.83073	4.42116	0.53	9.78189
p78~p79	17455.6	4.93403	5.09392	0.53	10.5579
p79~p80	17930.2	5.04162	4.26415	0.53	9.83577
p80~p81	18428.1	5.15392	4.46639	0.53	10.1503
p81~p82	18951.4	5.27132	4.72115	0.53	10.5225
p82~p83	19503.7	5.39452	4.9713	0.53	10.8958
p83~p84	20087.9	5.52412	4.71185	0.53	10.766
p84~p85	20708.5	5.66097	6.43603	0.53	12.627
p85~p86	21373.2	5.80666	5.27011	0.53	11.6068
p86~p87	22080.3	5.96066	5.91547	0.53	12.4061
p87~p88	22845.6	6.12627	5.18422	0.53	11.8405
p88~p89	23674.7	6.30445	6.03646	0.53	12.8709
p89~p90	24585.1	6.49873	6.4344	0.53	13.4631
p90~p91	25579.3	6.70927	6.38488	0.53	13.6241
p91~p92	26691.9	6.943	5.66919	0.53	13.1422
p92~p93	27947.7	7.20451	7.41044	0.53	15.1449
p93~p94	29390	7.50204	6.55696	0.53	14.589
p94~p95	31084	7.84789	8.69082	0.53	17.0687
p95~p96	33134	8.26148	9.80215	0.53	18.5936
p96~p97	35722	8.77651	9.74952	0.53	19.056
p97~p98	39237.4	9.46444	11.3004	0.53	21.2948
p98~p99	44703.6	10.5102	15.7502	0.53	26.7904
p99~p100	58242.5	12.9838	20.5282	0.53	34.042

## Sheet: Sheet5
Percentiles	Income (RMB)	HCCF (t CO2)	Inv_CF (t CO2)	Gov_CF (t CO2)	CF (t CO2)
p0~p1	324.319	0.223488	1.54074	1.133	2.89722
p1~p2	749.406	0.43147	1.73672	1.133	3.30119
p2~p3	1094.43	0.575734	2.73912	1.133	4.44785
p3~p4	1407.12	0.696864	1.33619	1.133	3.16606
p4~p5	1700.58	0.804645	1.71286	1.133	3.65051
p5~p6	1981.03	0.903479	2.00755	1.133	4.04403
p6~p7	2252.07	0.995814	2.07853	1.133	4.20734
p7~p8	2516.04	1.08318	2.1504	1.133	4.36657
p8~p9	2774.54	1.1666	2.33876	1.133	4.63836
p9~p10	3028.77	1.24683	2.44897	1.133	4.8288
p10~p11	3279.62	1.32441	2.4356	1.133	4.89301
p11~p12	3527.8	1.39977	2.3071	1.133	4.83987
p12~p13	3773.89	1.47324	2.29455	1.133	4.90078
p13~p14	4018.38	1.54508	2.69136	1.133	5.36944
p14~p15	4261.65	1.61553	2.58865	1.133	5.33718
p15~p16	4504.06	1.68477	2.72882	1.133	5.54659
p16~p17	4745.91	1.75295	2.77578	1.133	5.66174
p17~p18	4987.46	1.82022	3.21794	1.133	6.17116
p18~p19	5228.95	1.88669	2.66123	1.133	5.68092
p19~p20	5470.6	1.95247	2.61891	1.133	5.70438
p20~p21	5712.6	2.01764	2.80244	1.133	5.95308
p21~p22	5955.14	2.08229	2.83872	1.133	6.05401
p22~p23	6198.4	2.14649	3.6415	1.133	6.921
p23~p24	6442.52	2.21032	3.00192	1.133	6.34524
p24~p25	6687.66	2.27383	3.08877	1.133	6.49559
p25~p26	6933.97	2.33707	3.24024	1.133	6.71031
p26~p27	7181.6	2.40011	2.53676	1.133	6.06987
p27~p28	7430.67	2.46299	3.16567	1.133	6.76166
p28~p29	7681.32	2.52575	2.7348	1.133	6.39355
p29~p30	7933.68	2.58845	3.09243	1.133	6.81387
p30~p31	8187.89	2.65112	2.7015	1.133	6.48562
p31~p32	8444.07	2.7138	2.90885	1.133	6.75565
p32~p33	8702.36	2.77653	3.27125	1.133	7.18078
p33~p34	8962.87	2.83935	3.57028	1.133	7.54263
p34~p35	9225.75	2.9023	3.43742	1.133	7.47272
p35~p36	9491.12	2.9654	3.71288	1.133	7.81128
p36~p37	9759.13	3.0287	3.53627	1.133	7.69798
p37~p38	10029.9	3.09223	3.08707	1.133	7.3123
p38~p39	10303.6	3.15602	3.53882	1.133	7.82784
p39~p40	10580.3	3.22011	3.38905	1.133	7.74216
p40~p41	10860.2	3.28453	3.96061	1.133	8.37814
p41~p42	11143.5	3.34931	3.86298	1.133	8.34529
p42~p43	11430.3	3.41449	4.26814	1.133	8.81563
p43~p44	11720.8	3.48011	3.41805	1.133	8.03116
p44~p45	12015.1	3.54619	3.60618	1.133	8.28537
p45~p46	12313.4	3.61278	4.4298	1.133	9.17558
p46~p47	12616	3.67992	3.97641	1.133	8.78933
p47~p48	12922.9	3.74763	4.27029	1.133	9.15092
p48~p49	13234.5	3.81596	4.11795	1.133	9.06691
p49~p50	13550.9	3.88496	4.19739	1.133	9.21535
p50~p51	13872.3	3.95465	4.0281	1.133	9.11575
p51~p52	14199	4.02509	4.04391	1.133	9.20201
p52~p53	14531.2	4.09633	4.39063	1.133	9.61996
p53~p54	14869.2	4.1684	4.65878	1.133	9.96018
p54~p55	15213.3	4.24136	4.37415	1.133	9.74851
p55~p56	15563.7	4.31526	4.94566	1.133	10.3939
p56~p57	15920.8	4.39016	4.38157	1.133	9.90472
p57~p58	16284.9	4.46611	4.69313	1.133	10.2922
p58~p59	16656.5	4.54318	4.31321	1.133	9.98939
p59~p60	17035.7	4.62143	4.97506	1.133	10.7295
p60~p61	17423.2	4.70094	5.01761	1.133	10.8515
p61~p62	17819.2	4.78177	4.08738	1.133	10.0022
p62~p63	18224.4	4.86401	5.6875	1.133	11.6845
p63~p64	18639.1	4.94774	5.18056	1.133	11.2613
p64~p65	19064	5.03305	4.93927	1.133	11.1053
p65~p66	19499.6	5.12005	5.74471	1.133	11.9978
p66~p67	19946.7	5.20884	4.63385	1.133	10.9757
p67~p68	20405.8	5.29954	5.76049	1.133	12.193
p68~p69	20877.9	5.39227	5.84067	1.133	12.3659
p69~p70	21363.7	5.48717	5.20861	1.133	11.8288
p70~p71	21864.1	5.5844	5.85831	1.133	12.5757
p71~p72	22380.3	5.68411	5.86618	1.133	12.6833
p72~p73	22913.3	5.7865	5.87305	1.133	12.7925
p73~p74	23464.4	5.89175	6.71983	1.133	13.7446
p74~p75	24035	6.00011	6.31259	1.133	13.4457
p75~p76	24626.7	6.11181	6.63825	1.133	13.8831
p76~p77	25241.2	6.22715	5.49051	1.133	12.8507
p77~p78	25880.5	6.34642	6.61235	1.133	14.0918
p78~p79	26547	6.47	5.66095	1.133	13.264
p79~p80	27243.1	6.59829	6.15446	1.133	13.8858
p80~p81	27972	6.73175	7.04604	1.133	14.9108
p81~p82	28736.9	6.87093	7.28783	1.133	15.2918
p82~p83	29542	7.01644	7.4923	1.133	15.6417
p83~p84	30391.9	7.16902	7.53828	1.133	15.8403
p84~p85	31292.2	7.32954	7.27671	1.133	15.7393
p85~p86	32249.7	7.49903	8.11616	1.133	16.7482
p86~p87	33272.6	7.67874	8.81384	1.133	17.6256
p87~p88	34370.8	7.87022	9.7107	1.133	18.7139
p88~p89	35556.8	8.07536	8.90352	1.133	18.1119
p89~p90	36846.7	8.2966	9.20226	1.133	18.6319
p90~p91	38261.2	8.53707	10.8642	1.133	20.5343
p91~p92	39828	8.80092	11.7589	1.133	21.6928
p92~p93	41585.2	9.09388	13.392	1.133	23.6189
p93~p94	43587.3	9.42404	11.8079	1.133	22.3649
p94~p95	45916.5	9.80357	11.8798	1.133	22.8164
p95~p96	48705.1	10.2519	16.1765	1.133	27.5613
p96~p97	52187.4	10.803	16.0773	1.133	28.0134
p97~p98	56844.3	11.5263	17.3821	1.133	30.0414
p98~p99	63965.8	12.6047	24.7045	1.133	38.4423
p99~p100	82583.4	15.2695	33.0636	1.133	49.4661

## Sheet: Sheet6
Percentiles	Income (RMB)	HCCF (t CO2)	Inv_CF (t CO2)	Gov_CF (t CO2)	CF (t CO2)
p0~p1	155.542	0.0450273	0.590248	0.527	1.16228
p1~p2	371.46	0.100461	0.752689	0.527	1.38015
p2~p3	589.407	0.153414	0.746565	0.527	1.42698
p3~p4	809.424	0.205158	0.819275	0.527	1.55143
p4~p5	1031.55	0.256185	0.901927	0.527	1.68511
p5~p6	1255.83	0.306763	0.887149	0.527	1.72091
p6~p7	1482.31	0.357064	0.737604	0.527	1.62167
p7~p8	1711.03	0.407204	0.937415	0.527	1.87162
p8~p9	1942.04	0.457274	1.00276	0.527	1.98703
p9~p10	2175.39	0.507341	0.976805	0.527	2.01115
p10~p11	2411.13	0.557461	0.824379	0.527	1.90884
p11~p12	2649.31	0.60768	1.2829	0.527	2.41758
p12~p13	2889.98	0.658039	1.13083	0.527	2.31587
p13~p14	3133.2	0.708572	1.15552	0.527	2.39109
p14~p15	3379.02	0.759311	1.07466	0.527	2.36097
p15~p16	3627.5	0.810283	1.1346	0.527	2.47188
p16~p17	3878.71	0.861516	0.978886	0.527	2.3674
p17~p18	4132.71	0.913032	0.976378	0.527	2.41641
p18~p19	4389.56	0.964857	0.900357	0.527	2.39221
p19~p20	4649.34	1.01701	1.18994	0.527	2.73395
p20~p21	4912.1	1.06951	1.3158	0.527	2.91232
p21~p22	5177.92	1.12239	1.21827	0.527	2.86766
p22~p23	5446.89	1.17566	1.01003	0.527	2.71269
p23~p24	5719.07	1.22934	1.19942	0.527	2.95576
p24~p25	5994.55	1.28345	1.1802	0.527	2.99065
p25~p26	6273.41	1.33801	1.40939	0.527	3.2744
p26~p27	6555.74	1.39304	1.2227	0.527	3.14274
p27~p28	6841.64	1.44856	1.19037	0.527	3.16593
p28~p29	7131.19	1.50459	1.01516	0.527	3.04675
p29~p30	7424.5	1.56116	1.39108	0.527	3.47924
p30~p31	7721.66	1.61828	1.54164	0.527	3.68692
p31~p32	8022.79	1.67597	1.6631	0.527	3.86607
p32~p33	8328	1.73425	1.42459	0.527	3.68584
p33~p34	8637.41	1.79315	1.49165	0.527	3.8118
p34~p35	8951.13	1.8527	1.51772	0.527	3.89742
p35~p36	9269.3	1.9129	1.52332	0.527	3.96323
p36~p37	9592.05	1.9738	1.76061	0.527	4.26141
p37~p38	9919.51	2.03541	1.31994	0.527	3.88235
p38~p39	10251.8	2.09776	1.46396	0.527	4.08872
p39~p40	10589.2	2.16087	1.63774	0.527	4.32562
p40~p41	10931.7	2.22478	1.43361	0.527	4.18539
p41~p42	11279.6	2.28952	1.67823	0.527	4.49475
p42~p43	11633	2.35511	1.9301	0.527	4.81221
p43~p44	11992.1	2.42159	1.58321	0.527	4.5318
p44~p45	12357.1	2.48899	1.92553	0.527	4.94152
p45~p46	12728.2	2.55735	1.67949	0.527	4.76384
p46~p47	13105.6	2.6267	1.88892	0.527	5.04262
p47~p48	13489.6	2.69708	1.90981	0.527	5.13389
p48~p49	13880.4	2.76853	1.87726	0.527	5.1728
p49~p50	14278.3	2.8411	1.68896	0.527	5.05707
p50~p51	14683.5	2.91484	1.88166	0.527	5.3235
p51~p52	15096.3	2.98978	1.77541	0.527	5.29219
p52~p53	15517	3.06598	1.81132	0.527	5.4043
p53~p54	15946	3.14349	1.85999	0.527	5.53048
p54~p55	16383.5	3.22238	2.16185	0.527	5.91122
p55~p56	16830	3.30269	1.94845	0.527	5.77814
p56~p57	17285.8	3.38451	2.23214	0.527	6.14365
p57~p58	17751.5	3.46788	2.03345	0.527	6.02833
p58~p59	18227.3	3.55289	2.16349	0.527	6.24338
p59~p60	18713.8	3.63962	2.11742	0.527	6.28404
p60~p61	19211.4	3.72815	1.97785	0.527	6.233
p61~p62	19720.9	3.81857	2.19939	0.527	6.54495
p62~p63	20242.7	3.91097	2.00324	0.527	6.44121
p63~p64	20777.4	4.00546	1.96514	0.527	6.49761
p64~p65	21325.9	4.10216	2.37239	0.527	7.00156
p65~p66	21888.8	4.20119	2.47699	0.527	7.20518
p66~p67	22466.9	4.30267	2.41302	0.527	7.24269
p67~p68	23061.1	4.40675	2.34199	0.527	7.27574
p68~p69	23672.4	4.51359	1.97313	0.527	7.01372
p69~p70	24301.9	4.62336	2.27068	0.527	7.42105
p70~p71	24950.7	4.73625	2.3668	0.527	7.63006
p71~p72	25620.1	4.85246	2.76052	0.527	8.13999
p72~p73	26311.5	4.97223	2.77707	0.527	8.27629
p73~p74	27026.5	5.09579	2.74755	0.527	8.37034
p74~p75	27766.8	5.22345	2.55826	0.527	8.30871
p75~p76	28534.3	5.35549	2.75363	0.527	8.63613
p76~p77	29331.3	5.49229	2.60636	0.527	8.62565
p77~p78	30160.1	5.63423	3.60159	0.527	9.76282
p78~p79	31023.7	5.78175	3.20807	0.527	9.51682
p79~p80	31925	5.93538	2.76735	0.527	9.22973
p80~p81	32867.9	6.09568	3.32873	0.527	9.9514
p81~p82	33856.4	6.26333	3.10181	0.527	9.89214
p82~p83	34895.5	6.4391	3.64702	0.527	10.6131
p83~p84	35990.9	6.62391	3.64117	0.527	10.7921
p84~p85	37149.2	6.81884	3.3827	0.527	10.7285
p85~p86	38378.6	7.02517	3.62877	0.527	11.1809
p86~p87	39688.8	7.24445	3.44261	0.527	11.2141
p87~p88	41091.8	7.47857	4.10802	0.527	12.1136
p88~p89	42602.4	7.7299	4.0561	0.527	12.313
p89~p90	44239.4	8.00142	4.75594	0.527	13.2844
p90~p91	46027.1	8.29697	4.63489	0.527	13.4589
p91~p92	47997.7	8.62164	4.65689	0.527	13.8055
p92~p93	50195.4	8.98238	5.77655	0.527	15.2859
p93~p94	52682.5	9.38903	5.86204	0.527	15.7781
p94~p95	55552.4	9.85626	5.7099	0.527	16.0932
p95~p96	58953.5	10.4073	6.54707	0.527	17.4814
p96~p97	63145.3	11.0828	6.93925	0.527	18.5491
p97~p98	68651	11.9643	7.06014	0.527	19.5515
p98~p99	76837.8	13.264	9.82778	0.527	23.6187
p99~p100	96513.6	16.3335	14.1737	0.527	31.0341

## Sheet: Sheet7
Percentiles	Income (RMB)	HCCF (t CO2)	Inv_CF (t CO2)	Gov_CF (t CO2)	CF (t CO2)
p0~p1	177.837	0.108179	1.04487	0.473	1.62605
p1~p2	447.676	0.201927	1.10615	0.473	1.78108
p2~p3	682.647	0.26481	1.16335	0.473	1.90116
p3~p4	902.922	0.316707	1.246	0.473	2.0357
p4~p5	1114.43	0.362305	1.22173	0.473	2.05703
p5~p6	1320.09	0.403694	1.86895	0.473	2.74565
p6~p7	1521.61	0.442029	1.48566	0.473	2.40069
p7~p8	1720.13	0.478027	1.48445	0.473	2.43548
p8~p9	1916.47	0.512172	1.51765	0.473	2.50283
p9~p10	2111.21	0.544807	1.66156	0.473	2.67937
p10~p11	2304.81	0.576188	1.80459	0.473	2.85377
p11~p12	2497.66	0.606509	2.36425	0.473	3.44376
p12~p13	2690.06	0.635925	2.12295	0.473	3.23187
p13~p14	2882.27	0.66456	1.93592	0.473	3.07348
p14~p15	3074.51	0.692515	2.04936	0.473	3.21488
p15~p16	3266.98	0.719876	1.64799	0.473	2.84086
p16~p17	3459.85	0.746714	2.07427	0.473	3.29398
p17~p18	3653.27	0.773091	2.5474	0.473	3.7935
p18~p19	3847.39	0.79906	2.1148	0.473	3.38686
p19~p20	4042.34	0.824666	2.19959	0.473	3.49726
p20~p21	4238.24	0.849951	1.90245	0.473	3.2254
p21~p22	4435.22	0.874951	2.85193	0.473	4.19989
p22~p23	4633.38	0.899698	2.37087	0.473	3.74356
p23~p24	4832.82	0.924223	2.22423	0.473	3.62145
p24~p25	5033.66	0.948552	2.09168	0.473	3.51323
p25~p26	5236	0.972709	2.44612	0.473	3.89182
p26~p27	5439.93	0.996716	2.88316	0.473	4.35287
p27~p28	5645.55	1.0206	3.16496	0.473	4.65856
p28~p29	5852.96	1.04437	2.75099	0.473	4.26836
p29~p30	6062.27	1.06805	3.19972	0.473	4.74077
p30~p31	6273.56	1.09165	3.32275	0.473	4.88741
p31~p32	6486.93	1.1152	2.42097	0.473	4.00917
p32~p33	6702.49	1.13871	2.87492	0.473	4.48663
p33~p34	6920.34	1.16219	3.33231	0.473	4.9675
p34~p35	7140.59	1.18566	2.53615	0.473	4.1948
p35~p36	7363.34	1.20913	3.25923	0.473	4.94136
p36~p37	7588.69	1.23261	3.82762	0.473	5.53323
p37~p38	7816.77	1.25612	3.30958	0.473	5.0387
p38~p39	8047.68	1.27968	3.57351	0.473	5.32619
p39~p40	8281.56	1.30328	3.00313	0.473	4.77942
p40~p41	8518.52	1.32696	3.19997	0.473	4.99993
p41~p42	8758.68	1.35071	3.18823	0.473	5.01194
p42~p43	9002.2	1.37456	3.12767	0.473	4.97523
p43~p44	9249.2	1.3985	2.92427	0.473	4.79577
p44~p45	9499.84	1.42257	3.86917	0.473	5.76474
p45~p46	9754.26	1.44676	3.01703	0.473	4.93679
p46~p47	10012.6	1.4711	4.43017	0.473	6.37427
p47~p48	10275.1	1.49559	4.15325	0.473	6.12185
p48~p49	10541.9	1.52026	3.18402	0.473	5.17728
p49~p50	10813.1	1.5451	3.0585	0.473	5.07661
p50~p51	11089.1	1.57015	3.55156	0.473	5.5947
p51~p52	11369.9	1.5954	3.77737	0.473	5.84578
p52~p53	11655.8	1.62089	3.578	0.473	5.67189
p53~p54	11947.1	1.64662	3.30568	0.473	5.4253
p54~p55	12243.9	1.67261	3.47073	0.473	5.61634
p55~p56	12546.6	1.69888	4.15584	0.473	6.32772
p56~p57	12855.4	1.72544	4.08373	0.473	6.28217
p57~p58	13170.6	1.75232	3.6821	0.473	5.90742
p58~p59	13492.6	1.77954	3.75693	0.473	6.00947
p59~p60	13821.7	1.80711	3.73942	0.473	6.01954
p60~p61	14158.3	1.83507	4.04234	0.473	6.35041
p61~p62	14502.6	1.86343	4.39922	0.473	6.73565
p62~p63	14855.3	1.89222	4.43338	0.473	6.7986
p63~p64	15216.7	1.92146	5.4291	0.473	7.82357
p64~p65	15587.4	1.9512	4.93331	0.473	7.35751
p65~p66	15967.8	1.98145	4.18919	0.473	6.64364
p66~p67	16358.6	2.01226	4.55012	0.473	7.03537
p67~p68	16760.3	2.04366	5.48029	0.473	7.99695
p68~p69	17173.8	2.07568	4.87412	0.473	7.42281
p69~p70	17599.8	2.10839	4.59795	0.473	7.17934
p70~p71	18039	2.14181	5.03077	0.473	7.64559
p71~p72	18492.5	2.17602	5.56525	0.473	8.21427
p72~p73	18961.2	2.21105	5.41065	0.473	8.0947
p73~p74	19446.3	2.24698	4.92559	0.473	7.64557
p74~p75	19949.1	2.28388	4.42867	0.473	7.18555
p75~p76	20470.9	2.32182	4.47294	0.473	7.26777
p76~p77	21013.5	2.3609	5.48718	0.473	8.32109
p77~p78	21578.5	2.40122	6.11256	0.473	8.98678
p78~p79	22168	2.44287	5.72588	0.473	8.64175
p79~p80	22784.5	2.486	5.59156	0.473	8.55056
p80~p81	23430.4	2.53075	6.80464	0.473	9.80839
p81~p82	24109.1	2.57728	6.39996	0.473	9.45024
p82~p83	24824.1	2.62579	7.46075	0.473	10.5595
p83~p84	25579.7	2.67651	5.78926	0.473	8.93877
p84~p85	26380.9	2.72971	6.50921	0.473	9.71192
p85~p86	27233.8	2.7857	7.12048	0.473	10.3792
p86~p87	28145.9	2.84487	5.84398	0.473	9.16185
p87~p88	29126.3	2.90771	5.81018	0.473	9.19089
p88~p89	30186.2	2.97479	6.1076	0.473	9.55539
p89~p90	31340.2	3.04686	8.2561	0.473	11.776
p90~p91	32607.2	3.12488	6.96912	0.473	10.567
p91~p92	34012.2	3.21014	8.06279	0.473	11.7459
p92~p93	35589.9	3.30436	8.02463	0.473	11.802
p93~p94	37389.8	3.41003	7.899	0.473	11.782
p94~p95	39486.8	3.53083	9.17449	0.473	13.1783
p95~p96	42001.1	3.67265	9.58017	0.473	13.7258
p96~p97	45146.1	3.84576	9.7884	0.473	14.1072
p97~p98	49360.1	4.07095	12.2491	0.473	16.7931
p98~p99	55819.7	4.40277	14.4339	0.473	19.3097
p99~p100	72786.1	5.20141	16.6747	0.473	22.3491

## Sheet: Sheet8
Percentiles	Income (RMB)	HCCF (t CO2)	Inv_CF (t CO2)	Gov_CF (t CO2)	CF (t CO2)
p0~p1	290.912	0.141415	0.954293	0.69	1.78571
p1~p2	728.814	0.281238	0.934851	0.69	1.90609
p2~p3	1106.48	0.379867	1.02611	0.69	2.09598
p3~p4	1457.77	0.462995	0.997503	0.69	2.1505
p4~p5	1792.78	0.537017	1.26256	0.69	2.48957
p5~p6	2116.49	0.604854	1.27691	0.69	2.57177
p6~p7	2431.87	0.668146	0.973959	0.69	2.33211
p7~p8	2740.87	0.727924	1.0202	0.69	2.43813
p8~p9	3044.89	0.784892	1.43795	0.69	2.91284
p9~p10	3344.97	0.839553	1.55013	0.69	3.07968
p10~p11	3641.91	0.892285	1.08134	0.69	2.66363
p11~p12	3936.36	0.94338	1.1125	0.69	2.74588
p12~p13	4228.83	0.993069	1.86764	0.69	3.55071
p13~p14	4519.79	1.04154	1.15447	0.69	2.88601
p14~p15	4809.6	1.08894	1.44475	0.69	3.2237
p15~p16	5098.59	1.13541	1.09964	0.69	2.92505
p16~p17	5387.06	1.18106	1.38376	0.69	3.25482
p17~p18	5675.25	1.22597	1.71178	0.69	3.62775
p18~p19	5963.41	1.27023	1.69852	0.69	3.65875
p19~p20	6251.75	1.31392	1.64751	0.69	3.65143
p20~p21	6540.45	1.35709	1.74786	0.69	3.79495
p21~p22	6829.72	1.39981	1.64519	0.69	3.735
p22~p23	7119.71	1.44212	1.91688	0.69	4.049
p23~p24	7410.59	1.48408	1.50256	0.69	3.67664
p24~p25	7702.52	1.52571	1.43866	0.69	3.65437
p25~p26	7995.64	1.56707	1.56709	0.69	3.82416
p26~p27	8290.11	1.60819	1.93171	0.69	4.2299
p27~p28	8586.05	1.64909	1.67431	0.69	4.01341
p28~p29	8883.62	1.68982	1.96379	0.69	4.34361
p29~p30	9182.94	1.7304	2.27532	0.69	4.69572
p30~p31	9484.16	1.77086	2.06905	0.69	4.52992
p31~p32	9787.4	1.81123	2.2344	0.69	4.73563
p32~p33	10092.8	1.85153	1.87879	0.69	4.42031
p33~p34	10400.5	1.89178	1.55184	0.69	4.13361
p34~p35	10710.6	1.932	1.48842	0.69	4.11042
p35~p36	11023.3	1.97223	1.61913	0.69	4.28136
p36~p37	11338.8	2.01248	2.25751	0.69	4.95999
p37~p38	11657	2.05277	1.64159	0.69	4.38436
p38~p39	11978.3	2.09313	1.99501	0.69	4.77814
p39~p40	12302.7	2.13357	2.01174	0.69	4.83532
p40~p41	12630.5	2.17412	1.91582	0.69	4.77994
p41~p42	12961.7	2.2148	2.06098	0.69	4.96578
p42~p43	13296.5	2.25562	1.6454	0.69	4.59102
p43~p44	13635.1	2.29661	1.99333	0.69	4.97994
p44~p45	13977.7	2.33779	2.11161	0.69	5.1394
p45~p46	14324.5	2.37918	1.98566	0.69	5.05484
p46~p47	14675.6	2.4208	2.14344	0.69	5.25424
p47~p48	15031.3	2.46267	2.46275	0.69	5.61542
p48~p49	15391.8	2.50481	2.19648	0.69	5.39129
p49~p50	15757.2	2.54726	2.09385	0.69	5.33111
p50~p51	16127.8	2.59002	2.36215	0.69	5.64217
p51~p52	16504	2.63313	2.68315	0.69	6.00628
p52~p53	16885.8	2.67662	1.99204	0.69	5.35865
p53~p54	17273.6	2.7205	2.31619	0.69	5.72668
p54~p55	17667.7	2.7648	2.58048	0.69	6.03528
p55~p56	18068.4	2.80956	2.52055	0.69	6.02011
p56~p57	18475.9	2.8548	2.87118	0.69	6.41598
p57~p58	18890.8	2.90055	2.20604	0.69	5.79659
p58~p59	19313.2	2.94685	2.84515	0.69	6.482
p59~p60	19743.6	2.99374	2.68668	0.69	6.37042
p60~p61	20182.5	3.04124	2.62497	0.69	6.35621
p61~p62	20630.3	3.08941	2.22461	0.69	6.00402
p62~p63	21087.4	3.13827	2.69554	0.69	6.52381
p63~p64	21554.4	3.18789	2.74795	0.69	6.62584
p64~p65	22031.8	3.2383	2.63171	0.69	6.56
p65~p66	22520.3	3.28955	2.60695	0.69	6.58651
p66~p67	23020.5	3.34171	2.77655	0.69	6.80826
p67~p68	23533.2	3.39484	3.03243	0.69	7.11727
p68~p69	24059.1	3.44899	2.35588	0.69	6.49487
p69~p70	24599	3.50425	3.26728	0.69	7.46153
p70~p71	25154	3.56068	3.37051	0.69	7.62119
p71~p72	25725	3.61838	3.08209	0.69	7.39047
p72~p73	26313.3	3.67744	3.05992	0.69	7.42736
p73~p74	26920	3.73796	3.57574	0.69	8.0037
p74~p75	27546.5	3.80006	3.27346	0.69	7.76352
p75~p76	28194.6	3.86386	3.25344	0.69	7.8073
p76~p77	28865.8	3.92951	3.12572	0.69	7.74523
p77~p78	29562.3	3.99718	3.54929	0.69	8.23646
p78~p79	30286.2	4.06703	3.6101	0.69	8.36712
p79~p80	31040.2	4.13928	3.20664	0.69	8.03592
p80~p81	31827.2	4.21416	3.46551	0.69	8.36967
p81~p82	32650.6	4.29195	3.44064	0.69	8.42259
p82~p83	33514.4	4.37296	3.89324	0.69	8.9562
p83~p84	34423.2	4.45756	3.46922	0.69	8.61677
p84~p85	35382.7	4.54617	3.83764	0.69	9.07382
p85~p86	36399.3	4.63933	4.81201	0.69	10.1413
p86~p87	37481.1	4.73766	4.30128	0.69	9.72894
p87~p88	38637.9	4.84191	4.57427	0.69	10.1062
p88~p89	39882	4.95305	4.30842	0.69	9.95147
p89~p90	41228.9	5.07226	4.87092	0.69	10.6332
p90~p91	42698.8	5.20111	5.32003	0.69	11.2111
p91~p92	44318.4	5.34163	4.87658	0.69	10.9082
p92~p93	46124.6	5.49662	6.26703	0.69	12.4536
p93~p94	48169.7	5.67005	5.08003	0.69	11.4401
p94~p95	50532.5	5.86783	6.90103	0.69	13.4589
p95~p96	53338.9	6.09935	7.14424	0.69	13.9336
p96~p97	56810.7	6.38102	6.42841	0.69	13.4994
p97~p98	61400	6.74589	8.66956	0.69	16.1054
p98~p99	68307	7.28045	9.61829	0.69	17.5887
p99~p100	85701.4	8.55027	13.3307	0.69	22.571

## Sheet: Sheet9
Percentiles	Income (RMB)	HCCF (t CO2)	Inv_CF (t CO2)	Gov_CF (t CO2)	CF (t CO2)
p0~p1	4261.33	0.750142	0.905534	0.826	2.48168
p1~p2	7320.42	1.05249	0.770188	0.826	2.64868
p2~p3	9277.91	1.21403	1.14632	0.826	3.18635
p3~p4	10872	1.33541	0.93307	0.826	3.09448
p4~p5	12264.1	1.43562	1.20512	0.826	3.46674
p5~p6	13524.2	1.52244	1.34673	0.826	3.69518
p6~p7	14690.2	1.59993	1.15519	0.826	3.58112
p7~p8	15785.3	1.67048	1.34779	0.826	3.84427
p8~p9	16824.9	1.73567	1.28252	0.826	3.84418
p9~p10	17820	1.79656	1.33271	0.826	3.95527
p10~p11	18778.6	1.85395	1.50792	0.826	4.18787
p11~p12	19706.8	1.9084	1.42499	0.826	4.15939
p12~p13	20609.3	1.96037	1.26317	0.826	4.04954
p13~p14	21489.9	2.01022	1.67478	0.826	4.511
p14~p15	22351.9	2.05822	1.87156	0.826	4.75578
p15~p16	23197.8	2.10461	1.60873	0.826	4.53935
p16~p17	24029.8	2.14959	1.69878	0.826	4.67437
p17~p18	24849.8	2.1933	1.76813	0.826	4.78744
p18~p19	25659.4	2.2359	1.65252	0.826	4.71442
p19~p20	26460	2.27751	1.81411	0.826	4.91761
p20~p21	27252.8	2.31821	1.7708	0.826	4.91501
p21~p22	28039.1	2.35811	1.84065	0.826	5.02476
p22~p23	28819.7	2.39729	1.66427	0.826	4.88756
p23~p24	29595.6	2.43581	1.97627	0.826	5.23808
p24~p25	30367.7	2.47374	1.75248	0.826	5.05222
p25~p26	31136.6	2.51113	1.70724	0.826	5.04437
p26~p27	31903.1	2.54804	1.54721	0.826	4.92126
p27~p28	32667.8	2.58452	1.76459	0.826	5.17511
p28~p29	33431.3	2.62059	2.20272	0.826	5.64931
p29~p30	34194.3	2.65632	1.83093	0.826	5.31325
p30~p31	34957.3	2.69172	1.98792	0.826	5.50564
p31~p32	35720.7	2.72684	2.14406	0.826	5.6969
p32~p33	36485.2	2.76171	1.84734	0.826	5.43505
p33~p34	37251.2	2.79636	2.01552	0.826	5.63787
p34~p35	38019.2	2.8308	2.0423	0.826	5.6991
p35~p36	38789.6	2.86509	2.2024	0.826	5.89348
p36~p37	39563	2.89922	2.07855	0.826	5.80377
p37~p38	40339.7	2.93324	2.25322	0.826	6.01246
p38~p39	41120.2	2.96716	2.05104	0.826	5.84421
p39~p40	41905	3.00101	2.17359	0.826	6.0006
p40~p41	42694.5	3.03481	2.13408	0.826	5.99489
p41~p42	43489.1	3.06858	2.33906	0.826	6.23363
p42~p43	44289.4	3.10233	2.1802	0.826	6.10854
p43~p44	45095.8	3.1361	2.14952	0.826	6.11162
p44~p45	45908.7	3.1699	2.07536	0.826	6.07125
p45~p46	46728.7	3.20375	2.19242	0.826	6.22217
p46~p47	47556.2	3.23767	2.4763	0.826	6.53997
p47~p48	48391.7	3.27168	2.32825	0.826	6.42593
p48~p49	49235.8	3.30581	2.37229	0.826	6.5041
p49~p50	50089.1	3.34006	2.40925	0.826	6.57531
p50~p51	50951.9	3.37447	2.20722	0.826	6.40768
p51~p52	51825.1	3.40904	2.44825	0.826	6.6833
p52~p53	52709.1	3.44382	2.28249	0.826	6.55231
p53~p54	53604.7	3.47881	2.28017	0.826	6.58497
p54~p55	54512.5	3.51403	2.60554	0.826	6.94557
p55~p56	55433.1	3.54952	2.56075	0.826	6.93627
p56~p57	56367.4	3.5853	2.65414	0.826	7.06544
p57~p58	57316.2	3.62139	2.03032	0.826	6.47771
p58~p59	58280.2	3.65781	2.4622	0.826	6.94601
p59~p60	59260.5	3.6946	2.72379	0.826	7.24439
p60~p61	60257.8	3.73179	2.98431	0.826	7.5421
p61~p62	61273.4	3.7694	2.87134	0.826	7.46674
p62~p63	62308.2	3.80746	2.82511	0.826	7.45857
p63~p64	63363.3	3.84602	3.00772	0.826	7.67974
p64~p65	64440.2	3.88511	2.54297	0.826	7.25407
p65~p66	65540.1	3.92476	2.75165	0.826	7.50241
p66~p67	66664.6	3.96502	3.04429	0.826	7.83531
p67~p68	67815.1	4.00594	2.59531	0.826	7.42725
p68~p69	68993.6	4.04756	2.94691	0.826	7.82048
p69~p70	70201.8	4.08994	2.78654	0.826	7.70249
p70~p71	71441.8	4.13314	3.1534	0.826	8.11254
p71~p72	72716	4.17721	3.00778	0.826	8.01099
p72~p73	74026.9	4.22223	2.92144	0.826	7.96967
p73~p74	75377.3	4.26828	2.88523	0.826	7.97951
p74~p75	76770.3	4.31543	3.27353	0.826	8.41496
p75~p76	78209.4	4.36379	3.05999	0.826	8.24978
p76~p77	79698.5	4.41345	3.1171	0.826	8.35655
p77~p78	81242.1	4.46454	3.51395	0.826	8.80449
p78~p79	82845	4.51719	3.17147	0.826	8.51466
p79~p80	84513.1	4.57154	3.08879	0.826	8.48633
p80~p81	86252.8	4.62777	3.65011	0.826	9.10388
p81~p82	88071.8	4.68608	3.63183	0.826	9.14391
p82~p83	89978.8	4.7467	3.31206	0.826	8.88476
p83~p84	91984.1	4.80989	3.47361	0.826	9.1095
p84~p85	94100	4.87597	3.49978	0.826	9.20175
p85~p86	96341.2	4.94532	3.45754	0.826	9.22887
p86~p87	98725.5	5.01839	4.10388	0.826	9.94827
p87~p88	101275	5.09574	3.70707	0.826	9.62881
p88~p89	104016	5.17805	4.04156	0.826	10.0456
p89~p90	106984	5.2662	4.09804	0.826	10.1902
p90~p91	110224	5.3613	3.55621	0.826	9.74351
p91~p92	113795	5.46486	4.37864	0.826	10.6695
p92~p93	117780	5.57888	3.79025	0.826	10.1951
p93~p94	122296	5.70626	4.98515	0.826	11.5174
p94~p95	127521	5.85127	4.37323	0.826	11.0505
p95~p96	133737	6.02072	4.72237	0.826	11.5691
p96~p97	141445	6.22652	5.08895	0.826	12.1415
p97~p98	151669	6.49263	5.3484	0.826	12.667
p98~p99	167144	6.88179	5.49741	0.826	13.2052
p99~p100	206774	7.80458	6.16049	0.826	14.7911

[truncated: 22 more sheets: Sheet10, Sheet11, Sheet12, Sheet13, Sheet14, Sheet15, Sheet16, Sheet17, Sheet18, Sheet19, Sheet20, Sheet21, Sheet22, Sheet23, Sheet24, Sheet25, Sheet26, Sheet27, Sheet28, Sheet29 …]
